# Supplementary material for: PrimPol-deficient cells exhibit a pronounced G2 checkpoint response following UV damage
Source: PubMed Central journal article supplement (PMC4889237; doi:10.1080/15384101.2015.1128597), 2015-12-22
Supplement: kccy-15-07-1128597-s001.pdf [file kccy-15-07-1128597-s001.pdf]

**Figure S1. *PrimPol*<sup>-/-</sup> DT40 cells show altered survival and morphology after UV treatment.** (A) Live cells were counted on a haemocytometer with trypan blue stain 48 hrs after increased doses of UV-C. (B) Representative images of DAPI stained cells showing an increase in cells with fragmented nuclei 16 hrs after increasing UV-C doses, quantified in Fig 2A, scale bar 10  $\mu$ m. (C) Quantification of cells with fragmented nuclei 16 hrs after lower UV-C doses. (D) Apoptosis was analysed by following the activation of caspase 3 using a luminescence assay (Promega). WT and *PrimPol*<sup>-/-</sup> cells were analysed at 8 hrs following increasing doses of UV damage n=3 and error bars represent standard deviation.

**Figure S2. After UV-C treatment a population of cells become enlarged and unable to replicate but display no significant increase in DNA breaks.** Mitotic cells with multipolar spindles were counted as a percentage of the population at increasing time-points after 4 J/m<sup>2</sup> UV-C (A). DT40 cells were viewed under a light microscope 48 hrs after 5 J/m<sup>2</sup> UV-C damage to examine changes in morphology (B). These changes were seen more clearly after staining with DAPI, when cells were treated with 0 or 4 J/m<sup>2</sup> UV-C damage and allowed to recover for 24 hrs before being labelled with EdU for 16 hrs (green) to identify those not undergoing replication, quantified in Fig. 2F, scale bar represents 100  $\mu$ m (C). ssDNA gaps were analysed by alkaline comet assay after increasing doses of UV-C damage (D). Cells carrying chromosome breaks were counted in giemsa stained chromosome spreads from cells arrested with 0.5  $\mu$ M nocodazole for 4 hours after a 0 (E) or 16 hr (F) recovery period following increasing doses of UV-C damage. In all figures, error bars represent standard deviation for n= 3 independent experiments, significance was measured using a students T-test, \* p<0.05.

**Figure S3. *PrimPol*<sup>-/-</sup> cells are more resistant to abolition of the G2 checkpoint.** (A) The effect of 100 nM UCN-01 inhibitor on DT40 cells was assessed by Cell Titer Blue after a 48 hr incubation in the absence of damage. The effect of upstream kinases ATR and ATM was analysed by following cell viability using Cell Titer Blue 48 hrs after the addition of 10  $\mu$ M NU6027, ATR inhibitor after 0 (B), 4 J/m<sup>2</sup> UV-C (C) or caffeine (D,E) treated with 0 or 4 J/m<sup>2</sup> UV-C, respectively. (F) The effect of caffeine was also studied in a colony formation assay with 2 mM caffeine. This is the

figure shown in Fig. 4B with addition of error bars representing standard deviation. **(G)** Cell viability in the presence of the p38 inhibitor was quantified 48 hrs after addition of 2.5  $\mu$ M inhibitor in the absence of damage using Cell Titer Blue.

**Figure S4. UCN-01 causes an increase in G1 populations in WT but not *PrimPol*<sup>-/-</sup> cells. (A)** FACS analysis was used to assess the effect of the UCN-01 checkpoint inhibitor on undamaged cells by propidium iodide staining 24 hrs after incubation, FACS plots are shown in comparison with untreated cells, which are quantified in Fig.5C. **(B)** Sub G1 cells were also quantified, n=3 error bars represent standard deviation and significance was determined by students T-test (\* p<0.05). **(C)** Images representing a number of aberrant observed by live cell imaging after UV-C damage including failure of cytokinesis and incorrect division to form 3 daughter cells.

**A**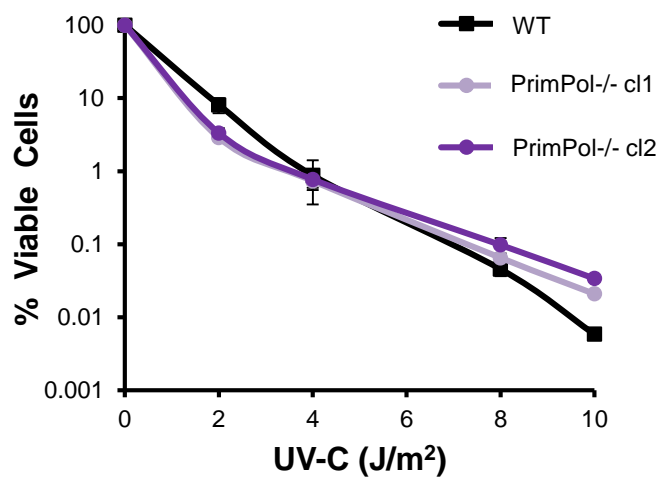**B**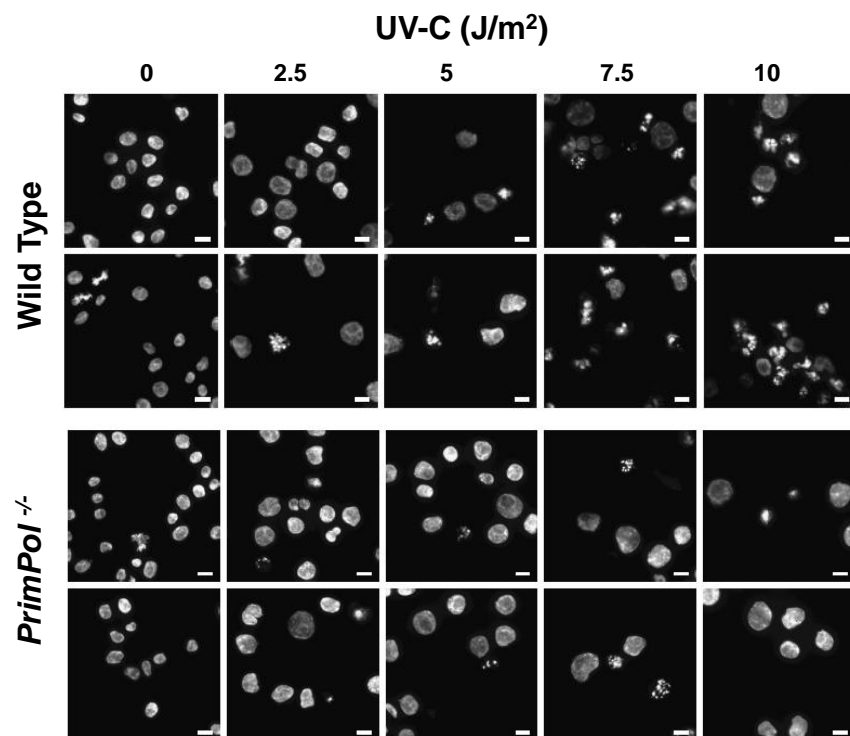**C**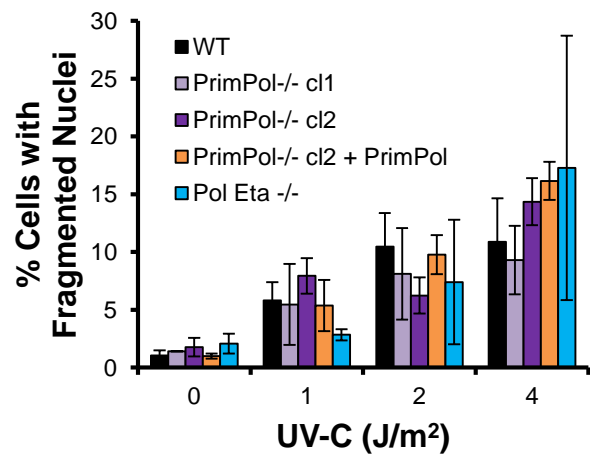**D**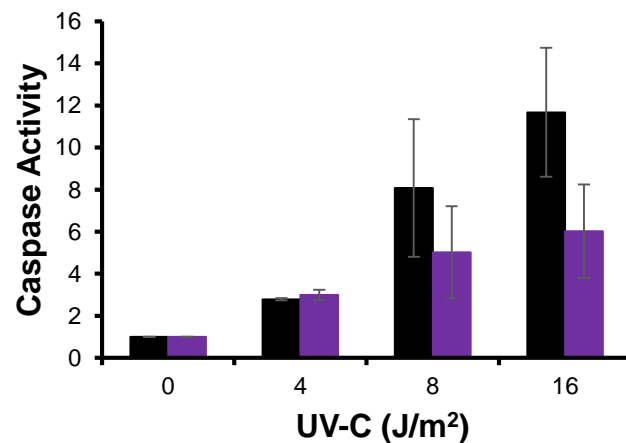**Figure S1**

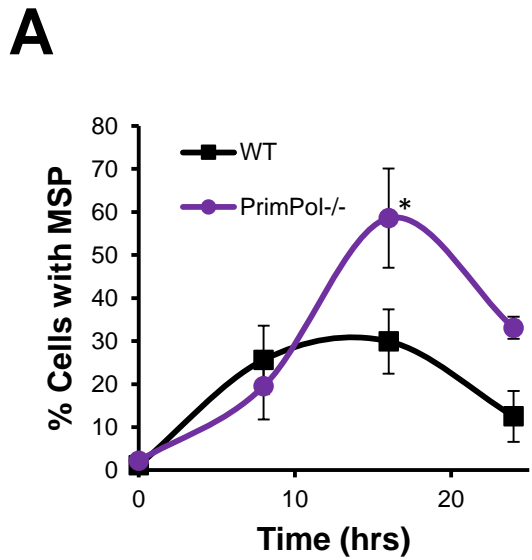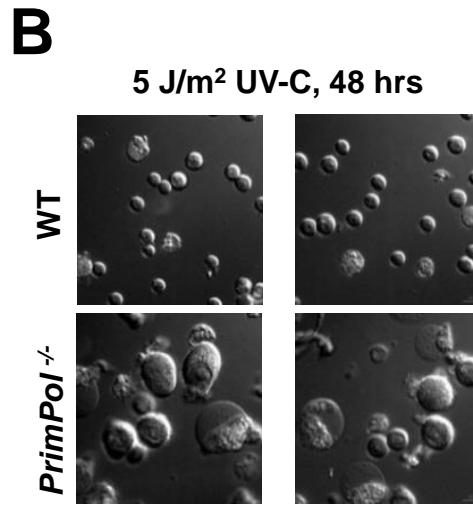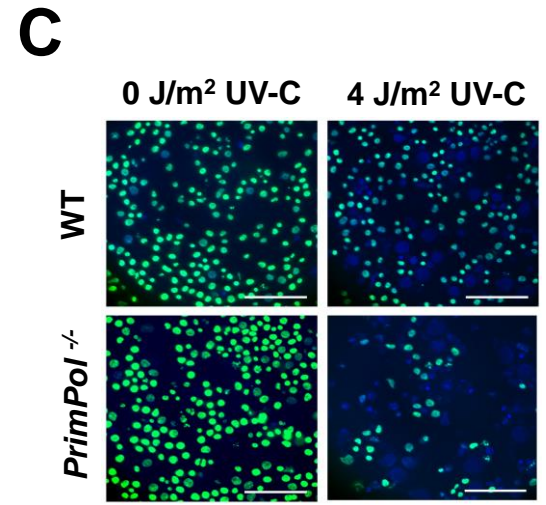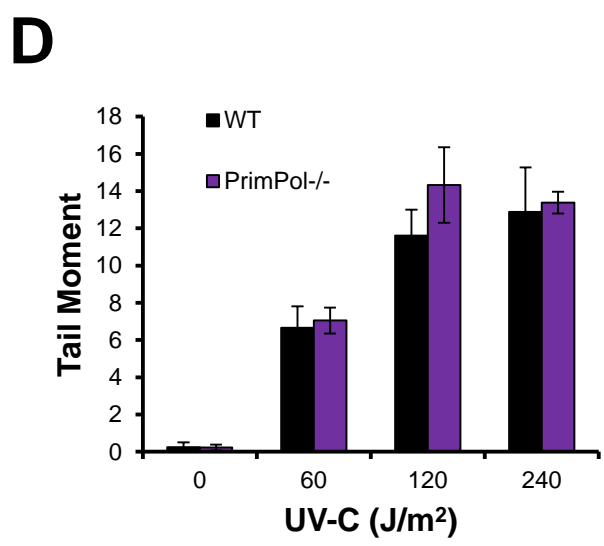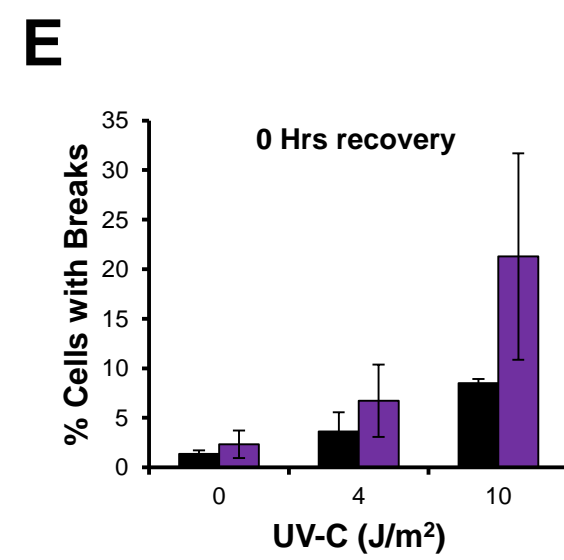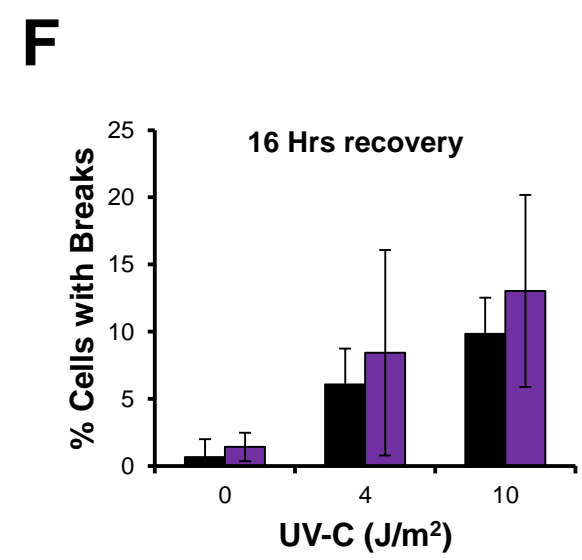

**Figure S2**

**A**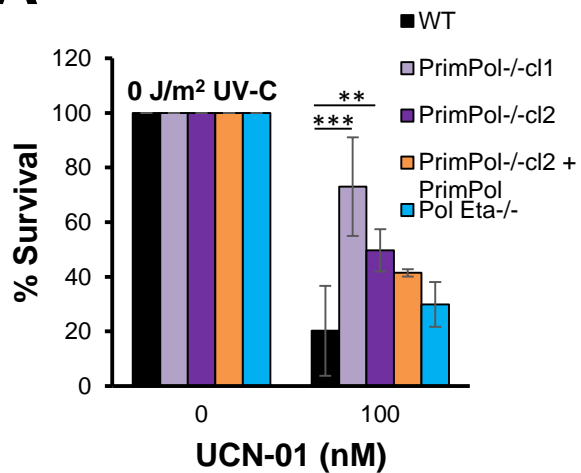**B**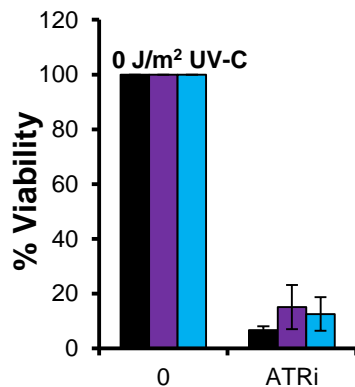**C**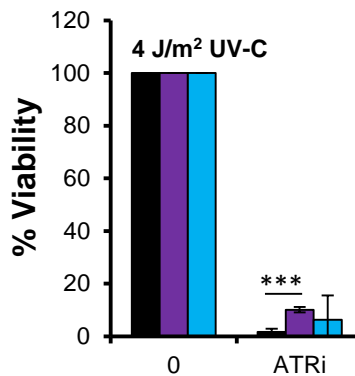**D**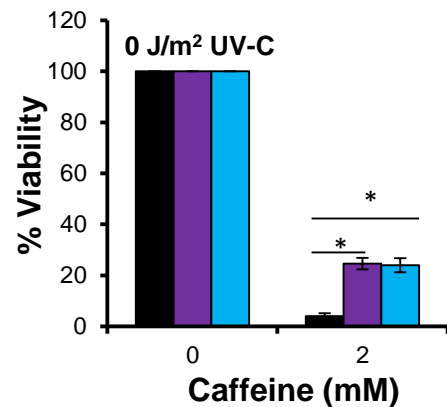**E**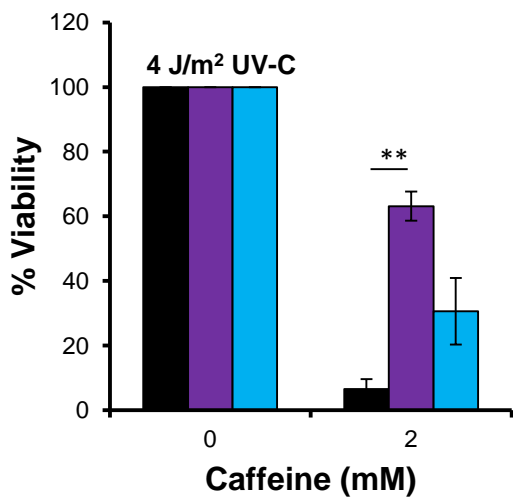**F**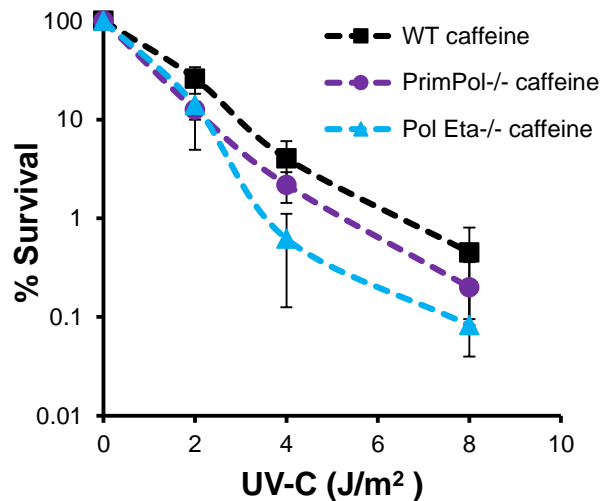**G**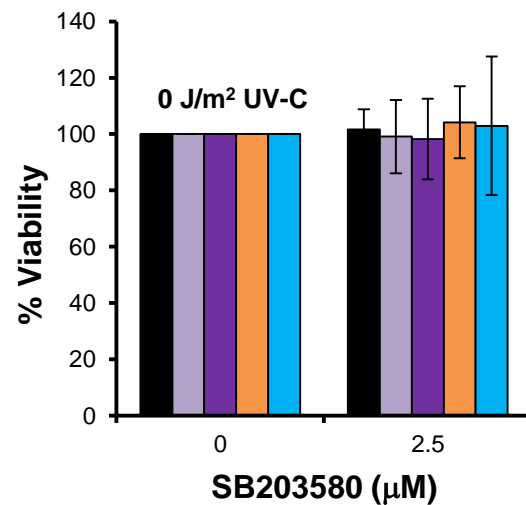**Figure S3**

**A**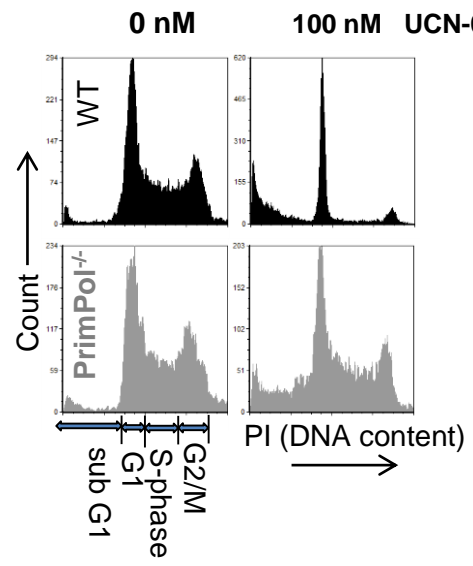**B**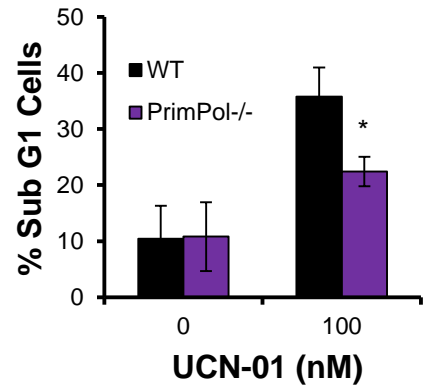**C**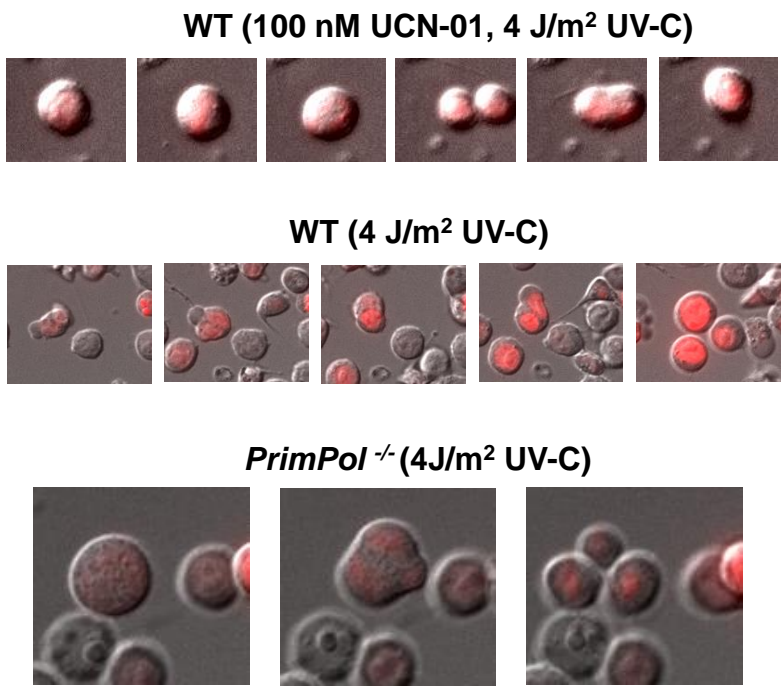**Figure S4**
